# Supplementary material for: Role of Dissimilative Pathway of Komagataella phaffii (Pichia pastoris): Formaldehyde Toxicity and Energy Metabolism
Source: MDPI journal article supplement (doi:10.3390/microorganisms10071466), 2022-07-20
Supplement: s1 [file s1]

Supplementary Information:

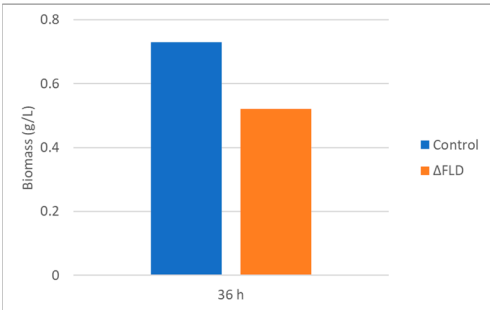

**Figure S1.** Biomass growth of control and  $\Delta fld1$  strains of *K. phaffii* obtained after 36h culture in define media using 11.9 g/L methanol (1.5% v/v) as the only carbon source. A 0.3 g/L inoculum using cells previously grown in 3 g/L methanol was utilised. Two independent replicates for each strain were performed (SEM < 0.02 g/L)

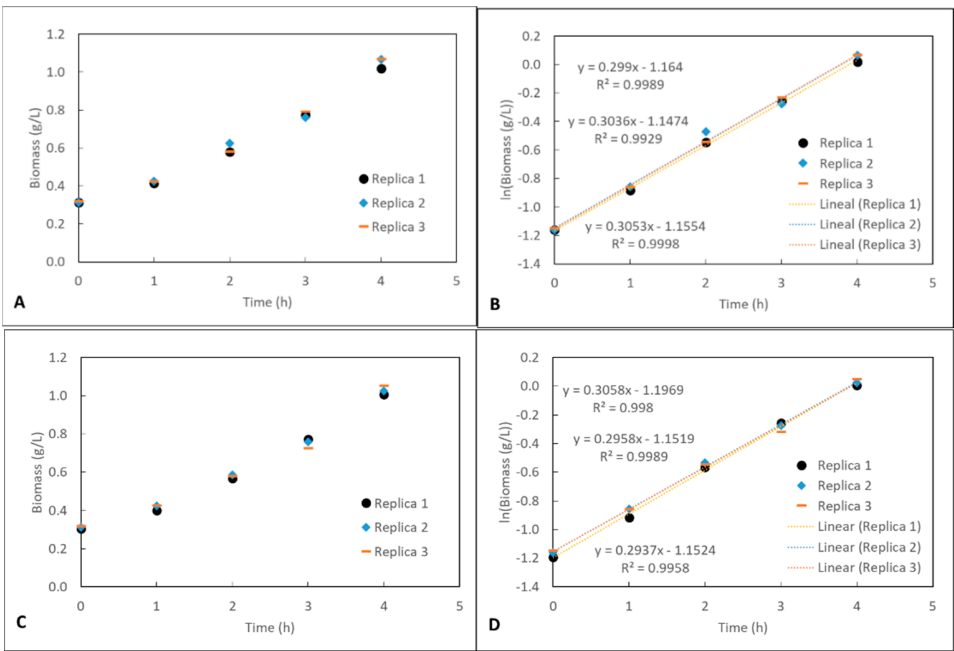

**Figure S2.** Biomass growth profiles obtained in define media using glycerol 3 g/L as the only carbon source (A) Growth profile for the control strain. (B)  $\ln(\text{biomass concentration})$  vs time for the control strain. Linear regression and equation for each replica is also included. (C) Growth profile for the  $\Delta fld1$  strain. (D)  $\ln(\text{biomass concentration})$  vs time for the  $\Delta fld1$  strain. Linear regression and equation for each run is also included. Specific growth rate ( $\mu$ ) values are shown in Figure 2 in the article.

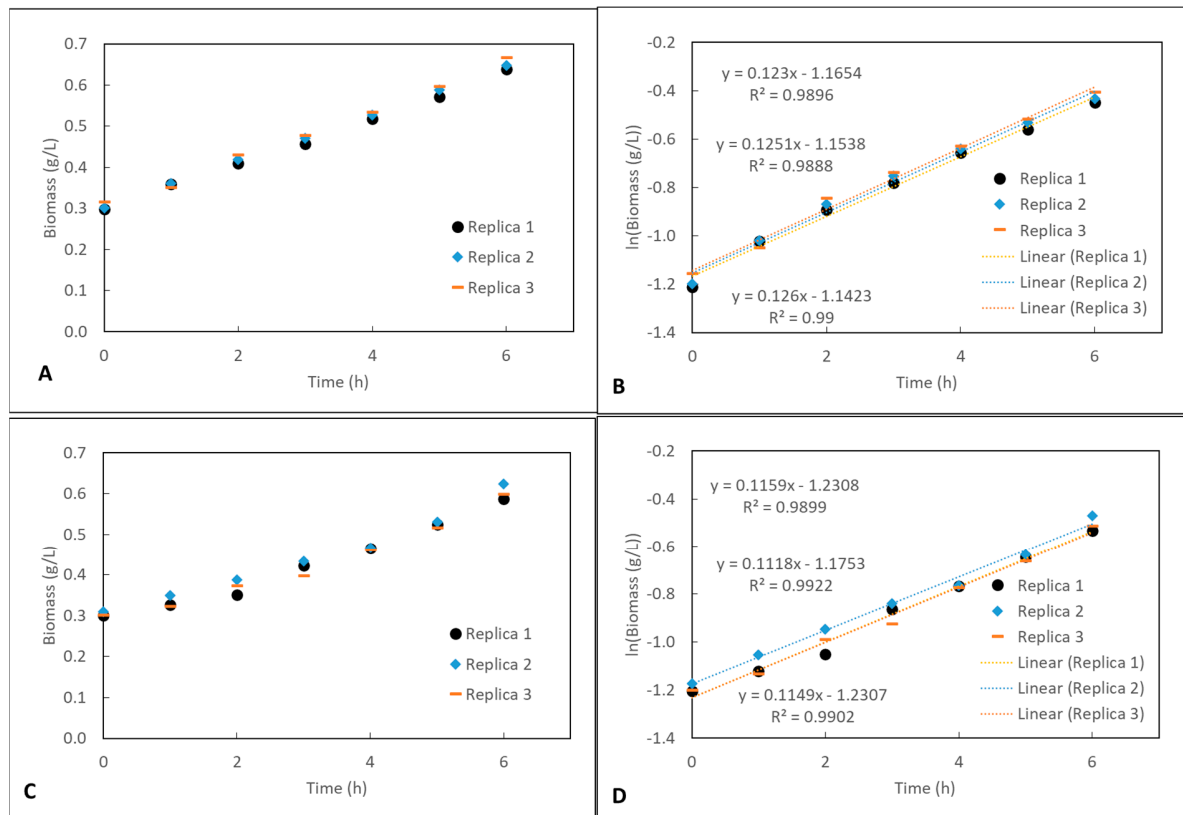

**Figure S3.** Biomass growth profiles obtained in define media using methanol 3 g/L as the only carbon source (A) Growth profile for the control strain. (B)  $\ln(\text{biomass concentration})$  vs time for the control strain. Linear regression and equation for each replica is also included. (C) Growth profile for the  $\Delta fld1$  strain. (D)  $\ln(\text{biomass concentration})$  vs time for the  $\Delta fld1$  strain. Linear regression and equation for each run is also included. Specific growth rate ( $\mu$ ) values are shown in Figure 2 in the article.
